# Supplementary material for: Investigation of selective sensing of a diamine for aldehyde by experimental and simulation studies
Source: Royal Society of Chemistry journal article supplement (doi:10.1039/c4an01387e), 2014-09-23
Supplement: c4an01387e1.pdf [file c4an01387e1.pdf]

## Investigation of selective sensing of a diamine for aldehyde - by and experimental and simulation studies.

Ashwini N Mallya and Praveen C Ramamurthy\*

\* *Department of Materials Engineering, Indian Institute of Science, Bangalore, India. Fax: (+91) 80-2306-0472; Tel: (+91) 80-2293-2627; E-mail: onegroupb203@gmail.com*

Electronic Supplementary Information (ESI)

The density of OPD-DAP-CB-DMPU on compression (Fig S1) and after relaxing to atmospheric pressure (Fig S2) is shown. Fig S3 shows the response of the OPD sensor to formaldehyde vapours for 0 CB loading.

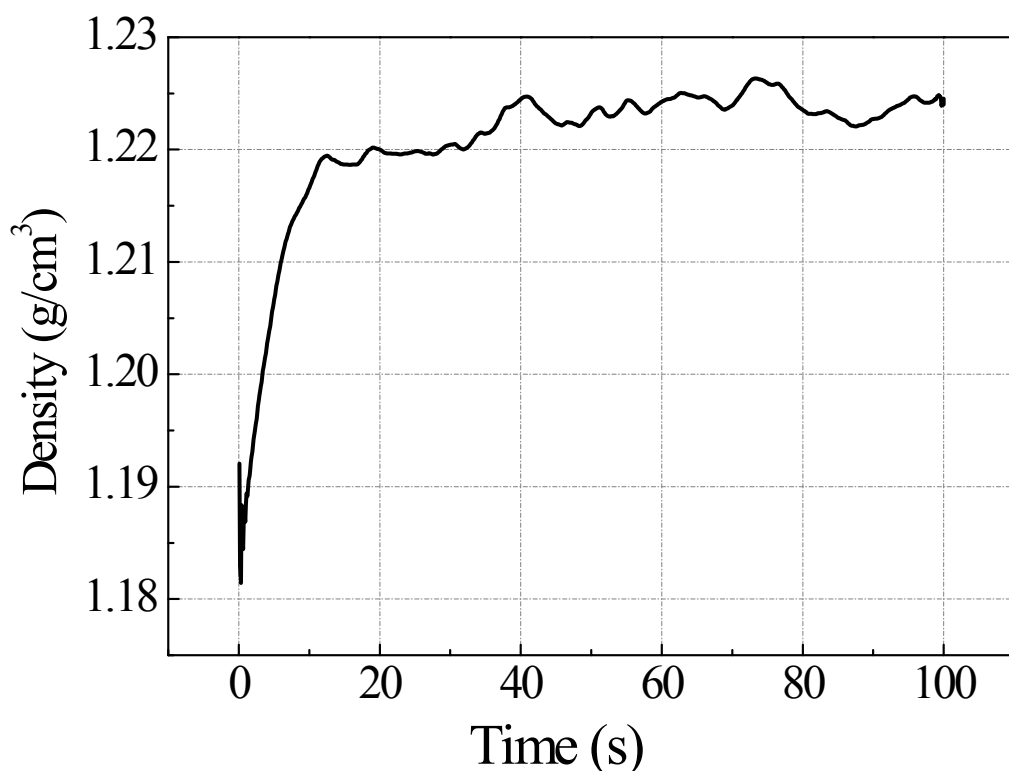

Fig. S1: Density of OPD-DAP-CB-DMPU packed cell after compression.

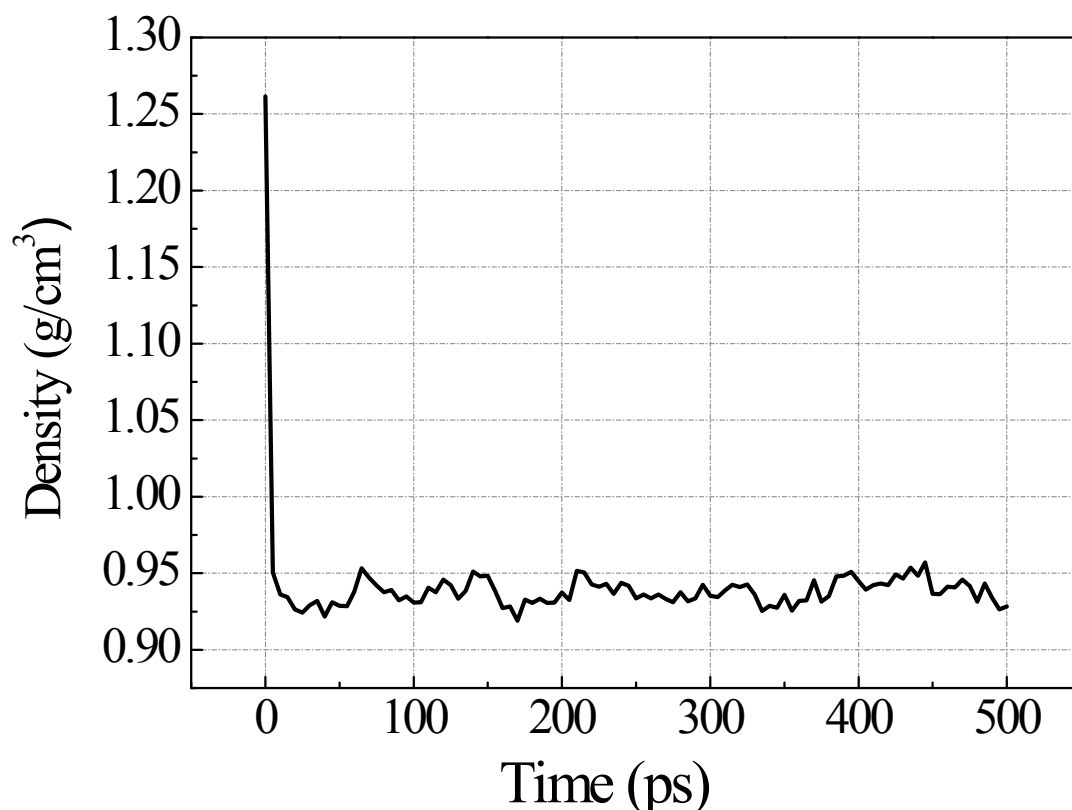

Fig. S2: Density of OPD-DAP-CB-DMPU packed cell after relaxation to atmospheric pressure.

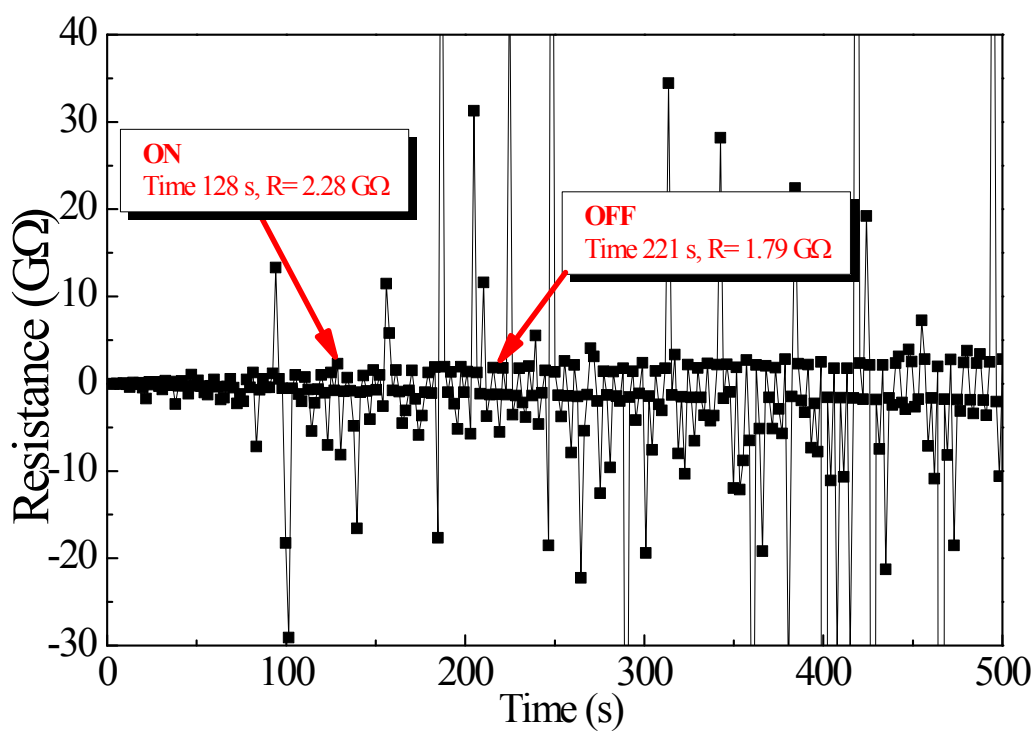

Fig S3: Reponse of OPD sensor for formaldehyde at 0 carbon black loading.
